# Supplementary material for: The NAD kinase OsNADK1 affects the intracellular redox balance and enhances the tolerance of rice to drought
Source: BMC Plant Biol. 2020 Jan 7;20:11. doi: 10.1186/s12870-019-2234-8 (PMC6947874; doi:10.1186/s12870-019-2234-8)
Supplement: Supplementary file 1 — Additional file 1 : Figure S1. The promoter sequence of OsNADK1 and its cis-element analysis. The cis-elements were scanned and identified by the PlantCARE programme (http://bioinformatics.psb.ugent.be/webtools/plantcare/html/) with the 2000-bp upstream nucleotide sequence of the OsNADK1 CDS (coding sequence). [file 12870_2019_2234_MOESM1_ESM.pdf]

# The *OsNADKI*'s promoter sequence and cis-element analysis

```

10      20      30      40      50      60      70
....|....|....|....|....|....|....|....|....|....|....|....|....|....|
GGGCAAGTTCAAATCAGTGGAAATGTAGCTTCTTTTAGCGGTTTCATGTCATTTGACATTTGACGAATACT
                                         CGTCA-motif
80      90      100     110     120     130     140
....|....|....|....|....|....|....|....|....|....|....|....|....|....|
CCCAGCTTCACTGATGAATTTTTTCAGATAACGACTGAGATGTATACTTGTACGTTTGGTGGCTACCTAAT
                        TGA-element
150     160     170     180     190     200     210
....|....|....|....|....|....|....|....|....|....|....|....|....|....|
CCAACGCTAGTTCAGAATGAAAGCAACTTTGAGTGCCCCAAAATACAAAGGCAAGTCACTGTACTCGTCA
                                         CGTCA-motif
220     230     240     250     260     270     280
....|....|....|....|....|....|....|....|....|....|....|....|....|....|
AGGGTATCTTTTATACACGGAATATTGGTCGAGACAAGAGAATTCTAAAGCTTCAGATCCGATGCAAATCT
290     300     310     320     330     340     350
....|....|....|....|....|....|....|....|....|....|....|....|....|....|
AACATAAGCCAACGAAATATACTTACTACGCAGCTATGTAAAAATGTTGTCTCTCATCTTGGAACATTTT
360     370     380     390     400     410     420
....|....|....|....|....|....|....|....|....|....|....|....|....|....|
TTTTCCGCGAACGCGCAAAAAAATCGCACGTCAATATATTAGAAGAAAAGAGTTATAGTTACACAACACA
                        CGTCA-motif
430     440     450     460     470     480     490
....|....|....|....|....|....|....|....|....|....|....|....|....|....|
ATTAGCTAGACCGGCTTATGCCAGGAGAAGAGAGAAAAAGTAAATAAAAAGCTGAAGCTTATAAACTA
500     510     520     530     540     550     560
....|....|....|....|....|....|....|....|....|....|....|....|....|....|
CGGCAGCTAAACACAACTCCAAGTAGCAGGAAGGGCCCAGCCACGCTACACTCCCAACAAGTCTCCAA
570     580     590     600     610     620     630
....|....|....|....|....|....|....|....|....|....|....|....|....|....|
AAGCGGCAATGCTAGTTAAAGACCACGTATGACCCTCTGAGTGGATGGATTTTCAGAACCACTGAGATTG
                        ABRE
640     650     660     670     680     690     700
....|....|....|....|....|....|....|....|....|....|....|....|....|....|
AAGAGAGCGCAGAGTCGAAAACCCTAGTGTTTCGTTTCCTTCCACAAC TGCCAAGCGATCAAGAGCACTAG
                                         MBS
710     720     730     740     750     760     770
....|....|....|....|....|....|....|....|....|....|....|....|....|....|
GAAGTCAAAGCCAGCATGGAGATGCTCAACTAAGCAGGCCCTGAAGGACAGCCACCAATTCTGGAACCAG
780     790     800     810     820     830     840
....|....|....|....|....|....|....|....|....|....|....|....|....|....|
CTGCCATGGGGAAGAGATAGCAGCCCAGCCAGGGAGGCGATAGCACACGCAACCAGACCTGCCGAGCAAA

```

850 860 870 880 890 900 910  
 ....|....|....|....|....|....|....|....|....|....|....|....|....|....|  
**CACATAGTCGAGGAGGATGTGTTTCACCGTCTCAAGATCCTAAGGCCATTCCCAACCCATGACACTAGAC**  
 920 930 940 950 960 970 980  
 ....|....|....|....|....|....|....|....|....|....|....|....|....|....|  
**ATAGTTTCCATAAACTCCACATCATCAAGAACTAGTACTAGACACTACTCTTCCAATGCAAATACCACT**  
 990 1000 1010 1020 1030 1040 1050  
 ....|....|....|....|....|....|....|....|....|....|....|....|....|....|  
**ATTCCATACTTAGATTTAATGCTATTTATCTCACATGATGCCTTGGATATTGTGTAGAAACCATTGTTTC**  
 ARE  
 1060 1070 1080 1090 1100 1110 1120  
 ....|....|....|....|....|....|....|....|....|....|....|....|....|....|  
**CTTCTCTTTTCTCATTATTTACTTGGCACATCATTTTTTCATCCTAGGTGGTAGCTTATTTAATGCTATA**  
 1130 1140 1150 1160 1170 1180 1190  
 ....|....|....|....|....|....|....|....|....|....|....|....|....|....|  
**GACACTATCCTAGTCATTGGGTGGAAATGGCCTAAACGCAAAGGGGCACGCCGAGTGACTATCGATTC**  
 P-box  
 1200 1210 1220 1230 1240 1250 1260  
 ....|....|....|....|....|....|....|....|....|....|....|....|....|....|  
**CACGCTGCTGAAATGCAAACCAAAGGATTCCGCAAAGTACTATAAAATATGTTTACCGGTTTTAATGATT**  
 ARE  
 1270 1280 1290 1300 1310 1320 1330  
 ....|....|....|....|....|....|....|....|....|....|....|....|....|....|  
**TTGTAGTCCTTAAAAAGATATTAGAGCTACAAGTTTTTCTAGGATAATTTTAAGAAAAATAGTGTAATAAT**  
 1340 1350 1360 1370 1380 1390 1400  
 ....|....|....|....|....|....|....|....|....|....|....|....|....|....|  
**ATAAGAATCTCGAGGTACGGCTCTCTCCTGCTATAAATACCTATAGAGAAGAGGTAACATTACCCTTTTTT**  
 1410 1420 1430 1440 1450 1460 1470  
 ....|....|....|....|....|....|....|....|....|....|....|....|....|....|  
**TTTCTTATATGAAATCAACAAGATATCTACTGAAACAACCTGGTGTTTAAGATAATATTAAGTTATAAAA**  
 MBS HSE  
 1480 1490 1500 1510 1520 1530 1540  
 ....|....|....|....|....|....|....|....|....|....|....|....|....|....|  
**TTTCAAAA**TTGAAATAATAACTAACCAAGTGACAGAAATATTCTGGTATATGATGGGATGAAAACGGGAA  
 ERE  
 1550 1560 1570 1580 1590 1600 1610  
 ....|....|....|....|....|....|....|....|....|....|....|....|....|....|  
**CGGGAAAAGGAAAGGGAACAGACCCACCAACCAACCAACCAACCAACCGGTTTAGCTTGCTGCTTGCCG**  
 1620 1630 1640 1650 1660 1670 1680  
 ....|....|....|....|....|....|....|....|....|....|....|....|....|....|  
**GCAGCAGTAACCACGAAAGCGCTCGGCTCCACACGCCACGCACACCCACACCCCAACCCAAAGCGGCAT**  
 ABRE

1690      1700      1710      1720      1730      1740      1750  
 ....|....|....|....|....|....|....|....|....|....|....|....|....|....|....|  
**CAGCGCACGCGTCA**AGTCGTAGCCTCACTGCGACCGGGACCCACCCACCCCTGGCCCCACCTGTCAGCCC  
 ABRE    CGTCA-motif  
 1760      1770      1780      1790      1800      1810      1820  
 ....|....|....|....|....|....|....|....|....|....|....|....|....|....|....|  
**CCCGTTGGTGTCAACTCCCGGTGGCCTCCTGCTTCGCCGATAAATAACCGAATCGGGGGGAGGAGGTGGA**  
 1830      1840      1850      1860      1870      1880      1890  
 ....|....|....|....|....|....|....|....|....|....|....|....|....|....|....|  
**GGTGGTGTCTCCTCCTCCTCAACAGCGTCGCCTCGCGTCGGCGTCGCCTCTCACCACCCAACCACCAGTCC**  
 1900      1910      1920      1930      1940      1950      1960  
 ....|....|....|....|....|....|....|....|....|....|....|....|....|....|....|  
**ACCACCCACCTCTCTCCCTCCCCTCCCCTCCCCAAACCCAACCCGAGCCGAGGCCGGAATTTCTTTTTTG**  
 1970      1980      1990      2000    **-1**  
 ....|....|....|....|....|....|....|....|....|....|....|....|....|....|....|  
**GTGCGACGACGACGAGGTGAGGGTGAGCCAACCGCCGGATCGCGCCGCC** (ATG:Start condon for  
 OsNADK1)

### Cis-elements analysis in OsNADK1's promoter

| Plantcare element | Sequence   | Position | Species                      | Function                                                            |
|-------------------|------------|----------|------------------------------|---------------------------------------------------------------------|
| CGTCA-motif       | CGTCA      | -320     | <i>Hordeum vulgare</i>       | involved in the MeJA-responsiveness                                 |
|                   | CGTCA      | -1631    | <i>Hordeum vulgare</i>       | involved in the MeJA-responsiveness                                 |
|                   | TCAAG      | -1802    | <i>Hordeum vulgare</i>       | involved in the MeJA-responsiveness                                 |
|                   | TGACG      | -1950    | <i>Hordeum vulgare</i>       | involved in the MeJA-responsiveness                                 |
| ABRE              | CGCACGCGTC | -326     | <i>Hordeum vulgare</i>       | involved in the abscisic acid responsiveness                        |
|                   | GCCACGCACA | -365     | <i>Hordeum vulgare</i>       | involved in the abscisic acid responsiveness                        |
|                   | CACGTA     | -1426    | <i>Arabidopsis thaliana</i>  | involved in the abscisic acid responsiveness                        |
| ERE               | ATTTCAAAA  | -540     | <i>Dianthus caryophyllus</i> | ethylene-responsive element                                         |
| HSE               | ATAAAATTTC | -545     | <i>Brassica oleracea</i>     | involved in heat stress responsiveness                              |
| MBS               | CAACTG     | -573     | <i>Arabidopsis thaliana</i>  | involved in drought-inducibility                                    |
|                   | CAACTG     | -1336    | <i>Arabidopsis thaliana</i>  | involved in drought-inducibility                                    |
| ARE               | AAACCA     | -803     | <i>Zea mays</i>              | cis-acting regulatory element essential for the anaerobic induction |
|                   | AAACCA     | -972     | <i>Zea mays</i>              | cis-acting regulatory element essential for the anaerobic induction |
| p-box             | CAAAAGG    | -850     | <i>Oryza sativa</i>          | gibberellin-responsive element                                      |
| TGA-element       | AACGAC     | -1911    | <i>Brassica oleracea</i>     | auxin-responsive element                                            |
